# Supplementary material
Source: PubMed Central journal article supplement (PMC8128570)
Supplement: tables0375.pdf [file tables0375.pdf]

**On-line Table 1: Mean NAA/Cho ratios for the different brain regions examined in FM patients and HC**

| Brain Region                | Mean NAA/Cho in FM (N = 21) | Mean NAA/Cho in HC (N = 27) |
|-----------------------------|-----------------------------|-----------------------------|
| Right insula                | 0.892 ± 0.079               | 0.934 ± 0.072               |
| Left insula                 | 0.921 ± 0.086               | 0.916 ± 0.065               |
| Right thalamus              | 1.129 ± 0.090               | 1.129 ± 0.073               |
| Left thalamus               | 1.171 ± 0.085               | 1.181 ± 0.069               |
| Right putamen               | 0.956 ± 0.047               | 1.006 ± 0.063               |
| Left putamen                | 0.926 ± 0.070               | 1.034 ± 0.068               |
| Right caudate               | 0.875 ± 0.082               | 0.874 ± 0.079               |
| Left caudate                | 1.283 ± 0.179               | 1.175 ± 0.147               |
| Right DLPFC                 | 1.078 ± 0.103               | 1.177 ± 0.091               |
| Left DLPFC                  | 1.040 ± 0.083               | 1.078 ± 0.090               |
| Right posterior frontal WM  | 1.060 ± 0.073               | 1.098 ± 0.100               |
| Left posterior frontal WM   | 1.084 ± 0.080               | 1.097 ± 0.105               |
| Right anterior parietal WM  | 1.393 ± 0.123               | 1.415 ± 0.112               |
| Left anterior parietal WM   | 1.303 ± 0.108               | 1.289 ± 0.109               |
| Right posterior parietal WM | 1.448 ± 0.086               | 1.460 ± 0.116               |
| Left posterior parietal WM  | 1.400 ± 0.087               | 1.416 ± 0.116               |

**Note:**—DLPFC indicates dorsolateral prefrontal cortex; WM, white matter; NAA, *N*-acetylaspartate; Cho, choline; FM, fibromyalgia; HC, healthy controls.

**On-line Table 2. Mean Cho/Cr ratios for the different brain regions examined in FM patients and HC**

| Brain Region                | Mean Cho/Cr in FM (N = 21) | Mean Cho/Cr in HC (N = 27) |
|-----------------------------|----------------------------|----------------------------|
| Right insula                | 1.296 ± 0.153              | 1.264 ± 0.184              |
| Left insula                 | 1.289 ± 0.145              | 1.321 ± 0.106              |
| Right thalamus              | 1.112 ± 0.091              | 1.114 ± 0.103              |
| Left thalamus               | 1.078 ± 0.081              | 1.015 ± 0.052              |
| Right putamen               | 1.172 ± 0.129              | 1.191 ± 0.095              |
| Left putamen                | 1.242 ± 0.119              | 1.091 ± 0.076              |
| Right caudate               | 1.239 ± 0.179              | 1.279 ± 0.164              |
| Left caudate                | 1.538 ± 0.219              | 1.273 ± 0.123              |
| Right DLPFC                 | 1.343 ± 0.162              | 1.162 ± 0.051              |
| Left DLPFC                  | 1.230 ± 0.083              | 1.215 ± 0.078              |
| Right posterior frontal WM  | 1.413 ± 0.116              | 1.373 ± 0.067              |
| Left posterior frontal WM   | 1.405 ± 0.092              | 1.392 ± 0.099              |
| Right anterior parietal WM  | 1.290 ± 0.109              | 1.294 ± 0.084              |
| Left anterior parietal WM   | 1.313 ± 0.107              | 1.266 ± 0.088              |
| Right posterior parietal WM | 1.101 ± 0.069              | 1.057 ± 0.068              |
| Left posterior parietal WM  | 1.121 ± 0.097              | 1.031 ± 0.064              |

**Note:**—DLPFC indicates dorsolateral prefrontal cortex; WM, white matter; NAA, *N*-acetylaspartate; Cho, choline; FM, fibromyalgia; HC, healthy controls.

**On-line Table 3: Mean NAA/Cr ratios for the different brain regions examined in FM patients and HC**

| Brain Region                | Mean NAA/Cr in FM (N = 21) | Mean NAA/Cr in HC (N = 27) |
|-----------------------------|----------------------------|----------------------------|
| Right insula                | 1.141 ± 0.140              | 1.159 ± 0.164              |
| Left insula                 | 1.154 ± 0.114              | 1.184 ± 0.079              |
| Right thalamus              | 1.235 ± 0.097              | 1.242 ± 0.123              |
| Left thalamus               | 1.245 ± 0.091              | 1.181 ± 0.052              |
| Right putamen               | 1.110 ± 0.113              | 1.179 ± 0.085              |
| Left putamen                | 1.134 ± 0.109              | 1.112 ± 0.083              |
| Right caudate               | 1.073 ± 0.163              | 1.109 ± 0.150              |
| Left caudate                | 1.283 ± 0.179              | 1.175 ± 0.147              |
| Right DLPFC                 | 1.373 ± 0.090              | 1.362 ± 0.108              |
| Left DLPFC                  | 1.260 ± 0.090              | 1.286 ± 0.104              |
| Right posterior frontal WM  | 1.469 ± 0.102              | 1.486 ± 0.119              |
| Left posterior frontal WM   | 1.508 ± 0.121              | 1.498 ± 0.132              |
| Right anterior parietal WM  | 1.752 ± 0.136              | 1.798 ± 0.136              |
| Left anterior parietal WM   | 1.672 ± 0.131              | 1.599 ± 0.137              |
| Right posterior parietal WM | 1.580 ± 0.101              | 1.518 ± 0.127              |
| Left posterior parietal WM  | 1.538 ± 0.097              | 1.436 ± 0.106              |

**Note:**—DLPFC indicates dorsolateral prefrontal cortex; WM, white matter; NAA, *N*-acetylaspartate; Cho, choline; FM, fibromyalgia; HC, healthy controls.
